# Supplementary material for: Rare coding TTN variants are associated with electrocardiographic QT interval in the general population
Source: PubMed Central journal article supplement (PMC4913250; doi:10.1038/srep28356), 2016-06-20

**Rare coding *TTN* variants are associated with electrocardiographic QT interval in the general population**

Ashish Kapoor<sup>1#</sup>, Kiranmayee Bakshy<sup>1#</sup>, Linda Xu<sup>1</sup>, Priyanka Nandakumar<sup>1</sup>, Dongwon Lee<sup>1</sup>, Eric Boerwinkle<sup>2</sup>, Megan L. Grove<sup>2</sup>, Dan E. Arking<sup>1</sup>, Aravinda Chakravarti<sup>1\*</sup>

**Supplementary Table S1:** Coding variants identified in 4,469 EA subjects in 28 ID genes.

| <b>Gene</b>     | <b>Transcript<sup>1</sup></b> | <b>ORF length</b> | <b>Synonymous</b> | <b>Nonsynonymous</b> | <b>Stopgain</b> | <b>Splice</b> | <b>All</b> | <b>#Variants/<br/>ORF length</b> |
|-----------------|-------------------------------|-------------------|-------------------|----------------------|-----------------|---------------|------------|----------------------------------|
| <i>ANKRD30A</i> | NM_052997                     | 4026              | 29                | 69                   | 2               | 3             | 103        | 0.026                            |
| <i>ATP1B1</i>   | NM_001677                     | 912               | 10                | 2                    | 0               | 0             | 12         | 0.013                            |
| <i>CAV1</i>     | NM_001172896                  | 444               | 2                 | 7                    | 0               | 0             | 9          | 0.020                            |
| <i>CAV2</i>     | NM_001233                     | 489               | 2                 | 7                    | 0               | 0             | 9          | 0.018                            |
| <i>CD59</i>     | NM_001127223                  | 387               | 6                 | 2                    | 0               | 0             | 8          | 0.021                            |
| <i>CDH11</i>    | NM_001797                     | 2391              | 22                | 30                   | 0               | 0             | 52         | 0.022                            |
| <i>CDH2</i>     | NM_001792                     | 2721              | 21                | 25                   | 0               | 0             | 46         | 0.017                            |
| <i>CIB1</i>     | NM_001277764                  | 696               | 3                 | 5                    | 0               | 0             | 8          | 0.011                            |
| <i>ERBB4</i>    | NM_005235                     | 3927              | 25                | 36                   | 1               | 0             | 62         | 0.016                            |
| <i>KCNJ4</i>    | NM_152868                     | 1338              | 19                | 7                    | 0               | 0             | 26         | 0.019                            |
| <i>KCNK3</i>    | NM_002246                     | 1185              | 5                 | 6                    | 0               | 0             | 11         | 0.009                            |
| <i>LRFN2</i>    | NM_020737                     | 2370              | 28                | 24                   | 0               | 0             | 52         | 0.022                            |
| <i>NOS1AP</i>   | NM_014697                     | 1521              | 14                | 12                   | 0               | 0             | 26         | 0.017                            |
| <i>NRAP</i>     | NM_001261463                  | 5196              | 54                | 119                  | 3               | 3             | 179        | 0.034                            |
| <i>PARVA</i>    | NM_018222                     | 1239              | 15                | 15                   | 0               | 1             | 31         | 0.025                            |
| <i>PKP2</i>     | NM_004572                     | 2646              | 10                | 39                   | 0               | 1             | 50         | 0.019                            |
| <i>PKP4</i>     | NM_003628                     | 3579              | 27                | 50                   | 0               | 0             | 77         | 0.022                            |
| <i>PRKCA</i>    | NM_002737                     | 2019              | 15                | 14                   | 1               | 0             | 30         | 0.015                            |
| <i>PTK2</i>     | NM_001199649                  | 3198              | 17                | 32                   | 0               | 1             | 50         | 0.016                            |
| <i>SCN5A</i>    | NM_000335                     | 6048              | 63                | 79                   | 1               | 0             | 143        | 0.024                            |
| <i>SGCZ</i>     | NM_139167                     | 939               | 5                 | 22                   | 1               | 0             | 28         | 0.030                            |
| <i>SIPA1L1</i>  | NM_001284247                  | 5412              | 46                | 63                   | 0               | 0             | 109        | 0.020                            |
| <i>SLC16A1</i>  | NM_003051                     | 1503              | 7                 | 12                   | 0               | 0             | 19         | 0.013                            |
| <i>SLC4A1</i>   | NM_000342                     | 2736              | 29                | 55                   | 0               | 0             | 84         | 0.031                            |
| <i>SLC8A1</i>   | NM_021097                     | 2922              | 27                | 26                   | 0               | 0             | 53         | 0.018                            |
| <i>SPTBN1</i>   | NM_003128                     | 7095              | 86                | 63                   | 0               | 0             | 149        | 0.021                            |
| <i>TLN1</i>     | NM_006289                     | 7626              | 62                | 64                   | 0               | 0             | 126        | 0.017                            |
| <i>TTN</i>      | NM_001267550                  | 107976            | 654               | 1609                 | 9               | 6             | 2278       | 0.021                            |
|                 |                               |                   | 1303              | 2494                 | 18              | 15            | 3830       |                                  |

<sup>1</sup>Most abundant human cardiac transcript

**Supplementary Table S2:** Coding variants identified in 1,880 AA subjects in 28 ID genes.

| <b>Gene</b>     | <b>Transcript<sup>1</sup></b> | <b>ORF length</b> | <b>Synonymous</b> | <b>Nonsynonymous</b> | <b>Stopgain</b> | <b>Splice</b> | <b>All</b> | <b>#Variants/<br/>ORF length</b> |
|-----------------|-------------------------------|-------------------|-------------------|----------------------|-----------------|---------------|------------|----------------------------------|
| <i>ANKRD30A</i> | NM_052997                     | 4026              | 21                | 58                   | 2               | 1             | 82         | 0.020                            |
| <i>ATP1B1</i>   | NM_001677                     | 912               | 8                 | 1                    | 0               | 0             | 9          | 0.010                            |
| <i>CAV1</i>     | NM_001172896                  | 444               | 3                 | 4                    | 0               | 0             | 7          | 0.016                            |
| <i>CAV2</i>     | NM_001233                     | 489               | 2                 | 5                    | 0               | 0             | 7          | 0.014                            |
| <i>CD59</i>     | NM_001127223                  | 387               | 6                 | 3                    | 0               | 0             | 9          | 0.023                            |
| <i>CDH11</i>    | NM_001797                     | 2391              | 17                | 23                   | 0               | 0             | 40         | 0.017                            |
| <i>CDH2</i>     | NM_001792                     | 2721              | 17                | 23                   | 0               | 0             | 40         | 0.015                            |
| <i>CIB1</i>     | NM_001277764                  | 696               | 9                 | 7                    | 1               | 0             | 17         | 0.024                            |
| <i>ERBB4</i>    | NM_005235                     | 3927              | 18                | 19                   | 0               | 1             | 38         | 0.010                            |
| <i>KCNJ4</i>    | NM_152868                     | 1338              | 16                | 1                    | 0               | 0             | 17         | 0.013                            |
| <i>KCNK3</i>    | NM_002246                     | 1185              | 9                 | 3                    | 0               | 0             | 12         | 0.010                            |
| <i>LRFN2</i>    | NM_020737                     | 2370              | 29                | 13                   | 0               | 0             | 42         | 0.018                            |
| <i>NOS1AP</i>   | NM_014697                     | 1521              | 14                | 8                    | 0               | 0             | 22         | 0.014                            |
| <i>NRAP</i>     | NM_001261463                  | 5196              | 41                | 92                   | 4               | 5             | 142        | 0.027                            |
| <i>PARVA</i>    | NM_018222                     | 1239              | 10                | 8                    | 0               | 1             | 19         | 0.015                            |
| <i>PKP2</i>     | NM_004572                     | 2646              | 16                | 34                   | 1               | 1             | 52         | 0.020                            |
| <i>PKP4</i>     | NM_003628                     | 3579              | 24                | 31                   | 1               | 2             | 58         | 0.016                            |
| <i>PRKCA</i>    | NM_002737                     | 2019              | 17                | 12                   | 0               | 0             | 29         | 0.014                            |
| <i>PTK2</i>     | NM_001199649                  | 3198              | 19                | 15                   | 1               | 0             | 35         | 0.011                            |
| <i>SCN5A</i>    | NM_000335                     | 6048              | 70                | 69                   | 1               | 0             | 140        | 0.023                            |
| <i>SGCZ</i>     | NM_139167                     | 939               | 1                 | 14                   | 0               | 1             | 16         | 0.017                            |
| <i>SIPA1L1</i>  | NM_001284247                  | 5412              | 37                | 36                   | 0               | 0             | 73         | 0.013                            |
| <i>SLC16A1</i>  | NM_003051                     | 1503              | 8                 | 10                   | 0               | 0             | 18         | 0.012                            |
| <i>SLC4A1</i>   | NM_000342                     | 2736              | 24                | 41                   | 0               | 0             | 65         | 0.024                            |
| <i>SLC8A1</i>   | NM_021097                     | 2922              | 11                | 21                   | 0               | 0             | 32         | 0.011                            |
| <i>SPTBN1</i>   | NM_003128                     | 7095              | 63                | 31                   | 0               | 0             | 94         | 0.013                            |
| <i>TLN1</i>     | NM_006289                     | 7626              | 52                | 35                   | 0               | 0             | 87         | 0.011                            |
| <i>TTN</i>      | NM_001267550                  | 107976            | 549               | 1218                 | 5               | 8             | 1780       | 0.016                            |
|                 |                               |                   | 1111              | 1835                 | 16              | 20            | 2982       |                                  |

<sup>1</sup>Most abundant human cardiac transcript

**Supplementary Table S3:** Sample ID(s) and corrected QT interval(s) of EA subjects carrying the QT interval associated variants.

| <b>Chr.Position (hg19)</b> | <b>Sample ID</b> | <b>Corrected QT Interval (ms)</b> | <b>Sample ID</b> | <b>Corrected QT Interval (ms)</b> |
|----------------------------|------------------|-----------------------------------|------------------|-----------------------------------|
| 2:179455718                | 13               | 530.48                            |                  |                                   |
| 2:179407497                | 16               | 479.77                            |                  |                                   |
| 2:212522534                | 13               | 530.48                            | 1                | 378.04                            |
| 2:179634919                | 8                | 473.63                            | 14               | 419.94                            |
| 2:179473995                | 11               | 461.01                            |                  |                                   |
| 2:179398282                | 11               | 461.01                            |                  |                                   |
| 2:179629385                | 10               | 460.66                            |                  |                                   |
| 2:179496930                | 10               | 460.66                            |                  |                                   |
| 2:179466803                | 3                | 457.08                            |                  |                                   |
| 8:13959964                 | 6                | 455.62                            |                  |                                   |
| 2:179424880                | 6                | 455.62                            |                  |                                   |
| 2:179413763                | 21               | 453.91                            |                  |                                   |
| 2:179486250                | 15               | 453.33                            |                  |                                   |
| 2:179644182                | 9                | 453.27                            |                  |                                   |
| 3:38592534                 | 15               | 453.33                            |                  |                                   |
| 2:179666975                | 19               | 452.35                            |                  |                                   |

**Supplementary Table S4:** Sample ID(s) and corrected QT interval(s) of AA subjects carrying the QT interval associated variants.

| <b>Chr.Position (hg19)</b> | <b>Sample ID</b> | <b>Corrected QT Interval (ms)</b> | <b>Sample ID</b> | <b>Corrected QT Interval (ms)</b> |
|----------------------------|------------------|-----------------------------------|------------------|-----------------------------------|
| 9:35711334                 | 22               | 694.91                            |                  |                                   |
| 2:179455331                | 22               | 694.91                            | 2                | 436.01                            |
| 2:179447784                | 20               | 493.94                            |                  |                                   |
| 3:38645514                 | 12               | 481.65                            |                  |                                   |
| 2:179528396                | 4                | 477.34                            |                  |                                   |
| 2:179447313                | 5                | 473.02                            |                  |                                   |
| 2:179428672-179428673      | 17               | 471.48                            |                  |                                   |
| 2:179451505                | 17               | 471.48                            |                  |                                   |
| 2:179497341                | 17               | 471.48                            |                  |                                   |
| 2:179434555                | 7                | 468.33                            |                  |                                   |
| 2:179440480                | 5                | 473.02                            | 18               | 422.24                            |

**Supplementary Table S5:** Allele counts from distinct ethnicities from the ExAC browser for the QT interval associated variants.

| Chr:Position (hg19)   | Gene         | cDNA change        | Protein change | dbSNP ID                 | ExAC allele count  | European (Non-Finnish) | European (Finnish) | African        | Latino           | South Asian      | East Asian     | Other        |
|-----------------------|--------------|--------------------|----------------|--------------------------|--------------------|------------------------|--------------------|----------------|------------------|------------------|----------------|--------------|
| 2:179398282           | <i>TTN</i>   | c.C103060T         | p.P34354S      | -                        | -                  |                        |                    |                |                  |                  |                |              |
| 2:179407497           | <i>TTN</i>   | c.G97084T          | p.A32362S      | -                        | -                  |                        |                    |                |                  |                  |                |              |
| 2:179413763           | <i>TTN</i>   | c.G92590A          | p.D30864N      | rs200621611              | 16/120638          | 10/66694               | 2/6608             | 0/9798         | 2/11542          | 2/16510          | 0/8588         | 0/898        |
| 2:179424880           | <i>TTN</i>   | c.T85979C          | p.L28660T      | rs397517733              | 2/120508           | 0/66620                | 0/6612             | 0/9778         | 0/11542          | 2/16496          | 0/8562         | 0/898        |
| 2:179428672-179428673 | <i>TTN</i>   | c.82186_82187CA>GT | p.Q27396V      | rs367804525, rs371604558 | 1/120622, 1/120618 | 1/66700, 1/66700       | 0/6610, 0/6610     | 0/9790, 0/9792 | 0/11538, 0/11536 | 0/16510, 0/16510 | 0/8570, 0/8574 | 0/900, 0/900 |
| 2:179434555           | <i>TTN</i>   | c.G76304A          | p.C25435Y      | rs767496380              | 1/120440           | 1/66610                | 0/6590             | 0/9792         | 0/11518          | 0/16500          | 0/8534         | 0/896        |
| 2:179440480           | <i>TTN</i>   | c.T70379G          | p.L23460R      | -                        | -                  |                        |                    |                |                  |                  |                |              |
| 2:179447313           | <i>TTN</i>   | c.C65870T          | p.P21957L      | -                        | -                  |                        |                    |                |                  |                  |                |              |
| 2:179447784           | <i>TTN</i>   | c.C65746T          | p.R21916W      | rs200155485              | 13/113940          | 9/63072                | 0/6386             | 1/9364         | 2/10772          | 1/15842          | 0/7642         | 0/862        |
| 2:179451505           | <i>TTN</i>   | c.G64123A          | p.V21375M      | rs371670651              | 1/120562           | 1/66702                | 0/6612             | 0/9798         | 0/11526          | 0/16510          | 0/8514         | 0/900        |
| 2:179455331           | <i>TTN</i>   | c.C61121T          | p.P20374L      | rs372969669              | 2/119910           | 0/66430                | 0/6612             | 2/9686         | 0/11522          | 0/16236          | 0/8530         | 0/894        |
| 2:179455718           | <i>TTN</i>   | c.G60734A          | p.R20245Q      | rs575837567              | 4/120604           | 0/66684                | 0/6614             | 2/9784         | 1/11548          | 0/16502          | 1/8572         | 0/900        |
| 2:179466803           | <i>TTN</i>   | c.C55195T          | p.P18399S      | rs774591174              | 1/120260           | 1/66594                | 0/6596             | 0/9790         | 0/11472          | 0/16480          | 0/8432         | 0/896        |
| 2:179473995           | <i>TTN</i>   | c.A52042G          | p.M17348V      | rs780570190              | 2/96388            | 0/56756                | 0/6604             | 0/8364         | 0/9774           | 0/7516           | 2/7236         | 0/698        |
| 2:179486250           | <i>TTN</i>   | c.A45301C          | p.N15101H      | -                        | -                  |                        |                    |                |                  |                  |                |              |
| 2:179496930           | <i>TTN</i>   | c.C43691G          | p.S14564C      | rs377015571              | 5/81630            | 5/44002                | 0/4888             | 0/7184         | 0/7190           | 0/11994          | 0/5730         | 0/642        |
| 2:179497341           | <i>TTN</i>   | c.G43392A          | p.M14464I      | rs370601384              | 3/120562           | 1/66652                | 0/6612             | 0/9780         | 1/11562          | 0/16506          | 0/8552         | 1/898        |
| 2:179528396           | <i>TTN</i>   | c.C36490A          | p.P12164T      | rs373422655              | 7/117870           | 0/64676                | 0/6614             | 6/8986         | 1/11572          | 0/16508          | 0/8622         | 0/892        |
| 2:179629385           | <i>TTN</i>   | c.A9857G           | p.K3286R       | rs200052398              | 15/121360          | 12/66732               | 0/6614             | 2/10406        | 0/11562          | 1/16512          | 0/8626         | 0/908        |
| 2:179634919           | <i>TTN</i>   | c.A8509T           | p.S2837C       | rs202024134              | 12/121362          | 11/66734               | 1/6614             | 0/10396        | 0/11558          | 0/16512          | 0/8640         | 0/908        |
| 2:179644182           | <i>TTN</i>   | c.A3737T           | p.H1246L       | rs201988645              | -                  |                        |                    |                |                  |                  |                |              |
| 2:179666975           | <i>TTN</i>   | c.G185A            | p.R62H         | rs758169489              | 15/121364          | 2/66738                | 0/6614             | 0/10406        | 0/11574          | 2/16512          | 11/8612        | 0/908        |
| 2:212522534           | <i>ERBB4</i> | c.C1891T           | p.H631Y        | -                        | -                  |                        |                    |                |                  |                  |                |              |
| 3:38592534            | <i>SCN5A</i> | c.G5326A           | p.V1776M       | rs199473314              | 3/121080           | 1/66740                | 0/6614             | 0/10076        | 0/11578          | 1/16512          | 1/8652         | 0/908        |
| 3:38645514            | <i>SCN5A</i> | c.G1579A           | p.G527R        | rs763550164              | 4/90200            | 1/50462                | 0/4766             | 0/7414         | 1/7450           | 1/13184          | 1/6260         | 0/664        |
| 8:13959964            | <i>SGCZ</i>  | c.G665T            | p.G222V        | rs769233485              | -                  |                        |                    |                |                  |                  |                |              |
| 9:35711334            | <i>TLN1</i>  | c.A3937G           | p.S1313G       | rs762642967              | 2/121374           | 1/66714                | 0/6614             | 0/10402        | 1/11574          | 0/16512          | 0/8650         | 0/908        |

**Supplementary Table S6:** Predicted functional effect from SIFT and PolyPhen-2 for the QT interval associated

variants.

| Chr:Position (hg19)   | Gene         | cDNA change        | Protein change | dbSNP ID                 | SIFT score   | SIFT prediction      | PolyPhen-2 score | PolyPhen-2 prediction     |
|-----------------------|--------------|--------------------|----------------|--------------------------|--------------|----------------------|------------------|---------------------------|
| 2:179398282           | <i>TTN</i>   | c.C103060T         | p.P34354S      | -                        | 0.093        | Tolerated            | 0.857            | Possibly damaging         |
| 2:179407497           | <i>TTN</i>   | c.G97084T          | p.A32362S      | -                        | 0.613        | Tolerated            | 0.001            | Benign                    |
| 2:179413763           | <i>TTN</i>   | c.G92590A          | p.D30864N      | rs200621611              | 0.137        | Tolerated            | 0.873            | Possibly damaging         |
| 2:179424880           | <i>TTN</i>   | c.T85979C          | p.I28660T      | rs397517733              | 0.008        | Deleterious          | 0.201            | Benign                    |
| 2:179428672-179428673 | <i>TTN</i>   | c.82186_82187CA>GT | p.Q27396V      | rs367804525, rs371604558 | 0.094, 0.681 | Tolerated, Tolerated | 0.473, 0.425     | Possibly damaging, Benign |
| 2:179434555           | <i>TTN</i>   | c.G76304A          | p.C25435Y      | rs767496380              | 0.005        | Deleterious          | 0.879            | Possibly damaging         |
| 2:179440480           | <i>TTN</i>   | c.T70379G          | p.L23460R      | -                        | 0.117        | Tolerated            | 0.995            | Probably damaging         |
| 2:179447313           | <i>TTN</i>   | c.C65870T          | p.P21957L      | -                        | 0.002        | Deleterious          | 1                | Probably damaging         |
| 2:179447784           | <i>TTN</i>   | c.C65746T          | p.R21916W      | rs200155485              | 0.005        | Deleterious          | 1                | Probably damaging         |
| 2:179451505           | <i>TTN</i>   | c.G64123A          | p.V21375M      | rs371670651              | 0.005        | Deleterious          | 1                | Probably damaging         |
| 2:179455331           | <i>TTN</i>   | c.C61121T          | p.P20374L      | rs372969669              | 0.138        | Tolerated            | 1                | Probably damaging         |
| 2:179455718           | <i>TTN</i>   | c.G60734A          | p.R20245Q      | rs575837567              | 0.018        | Deleterious          | 1                | Probably damaging         |
| 2:179466803           | <i>TTN</i>   | c.C55195T          | p.P18399S      | rs774591174              | 0.424        | Tolerated            | 0.987            | Probably damaging         |
| 2:179473995           | <i>TTN</i>   | c.A52042G          | p.M17348V      | rs780570190              | 0.503        | Tolerated            | 0                | Benign                    |
| 2:179486250           | <i>TTN</i>   | c.A45301C          | p.N15101H      | -                        | 0.333        | Tolerated            | 0.009            | Benign                    |
| 2:179496930           | <i>TTN</i>   | c.C43691G          | p.S14564C      | rs377015571              | 0.009        | Deleterious          | 1                | Probably damaging         |
| 2:179497341           | <i>TTN</i>   | c.G43392A          | p.M14464I      | rs370601384              | 0.022        | Deleterious          | 0.002            | Benign                    |
| 2:179528396           | <i>TTN</i>   | c.C36490A          | p.P12164T      | rs373422655              | .            | .                    | 0.02             | Benign                    |
| 2:179629385           | <i>TTN</i>   | c.A9857G           | p.K3286R       | rs200052398              | 0.22         | Tolerated            | 1                | Probably damaging         |
| 2:179634919           | <i>TTN</i>   | c.A8509T           | p.S2837C       | rs202024134              | 0.006        | Deleterious          | 1                | Probably damaging         |
| 2:179644182           | <i>TTN</i>   | c.A3737T           | p.H1246L       | rs201988645              | 0.63         | Tolerated            | 0.2              | Benign                    |
| 2:179666975           | <i>TTN</i>   | c.G185A            | p.R62H         | rs758169489              | 0.347        | Tolerated            | 1                | Probably damaging         |
| 2:212522534           | <i>ERBB4</i> | c.C1891T           | p.H631Y        | -                        | 0.053        | Tolerated            | 0                | Benign                    |
| 3:38592534            | <i>SCN5A</i> | c.G5326A           | p.V1776M       | rs199473314              | 0            | Deleterious          | 1                | Probably damaging         |
| 3:38645514            | <i>SCN5A</i> | c.G1579A           | p.G527R        | rs763550164              | 0.008        | Deleterious          | 1                | Probably damaging         |
| 8:13959964            | <i>SGCZ</i>  | c.G665T            | p.G222V        | rs769233485              | 0.004        | Deleterious          | 1                | Probably damaging         |
| 9:35711334            | <i>TLN1</i>  | c.A3937G           | p.S1313G       | rs762642967              | 0.168        | Tolerated            | 0.104            | Benign                    |

**Supplementary Figure S1:** Corrected QT interval distribution in 4,469 EA subjects.

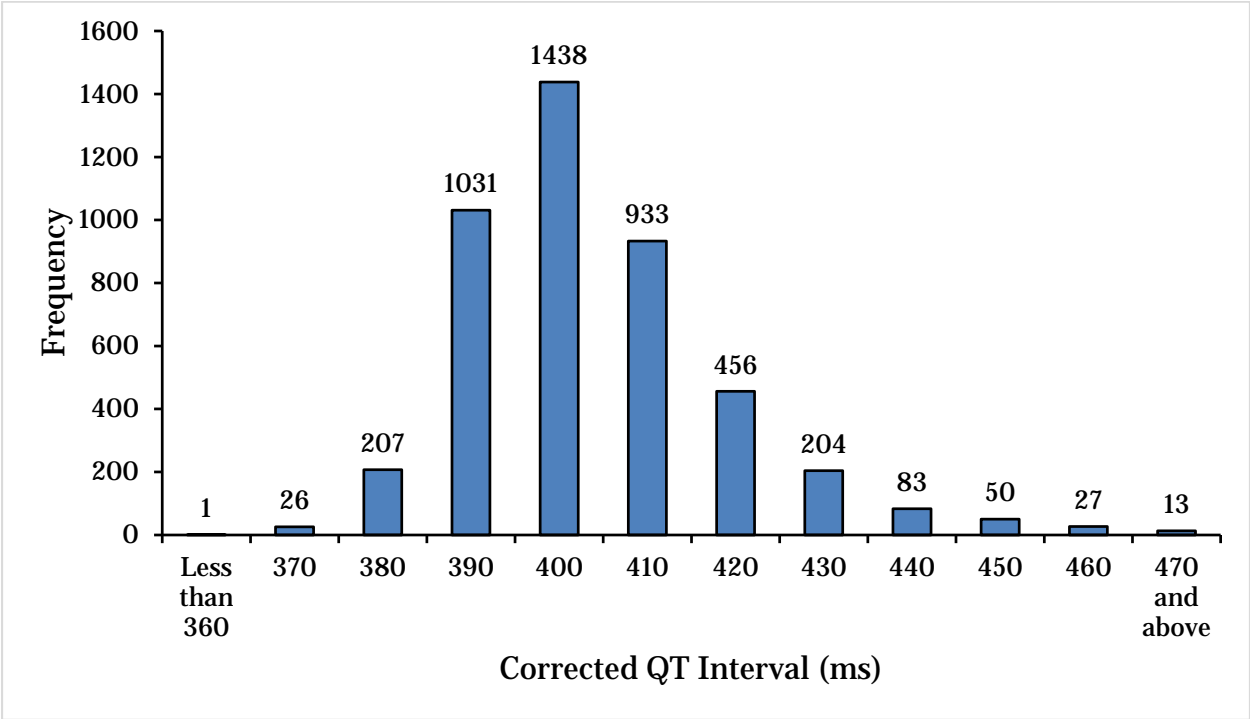



**Supplementary Figure S2:** Corrected QT interval distribution in 1,880 AA subjects.

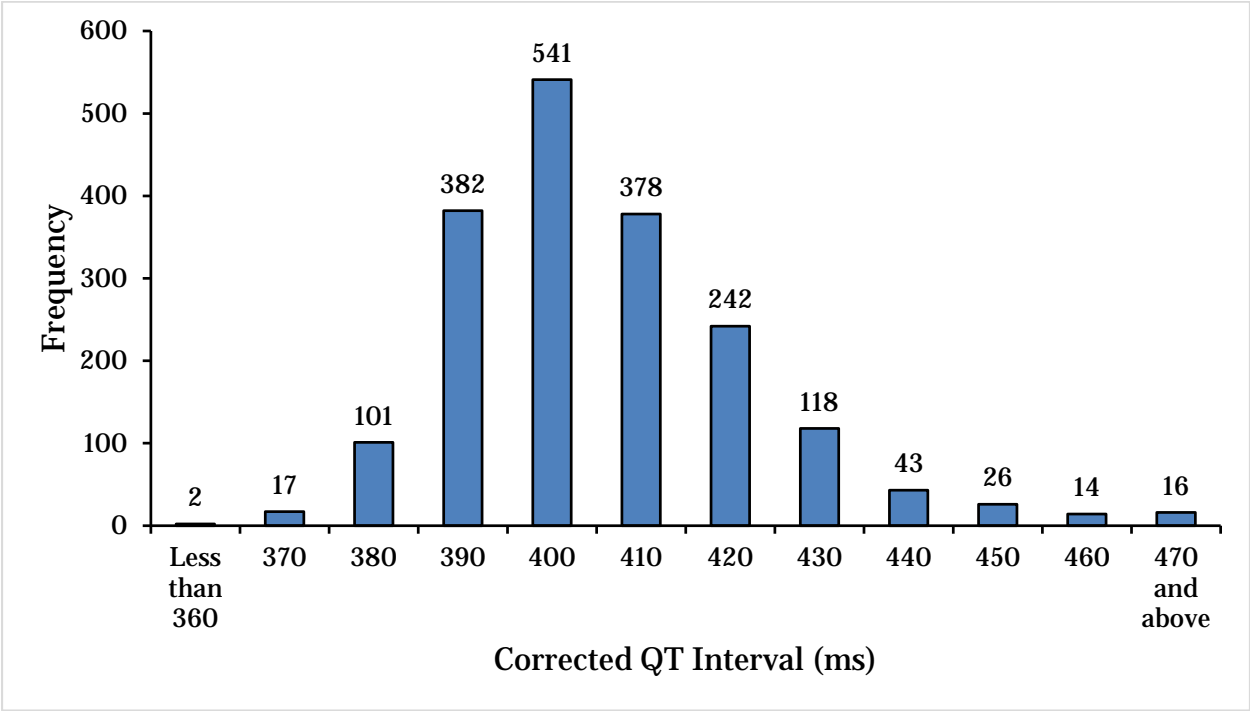

Supplement: srep28356-s1.pdf [file srep28356-s1.pdf]
